# Supplementary material for: Functional Significance of the Interaction between the mRNA-binding Protein, Nab2, and the Nuclear Pore-associated Protein, Mlp1, in mRNA Export
Source: PubMed Central journal article supplement — J Biol Chem. 2008 Oct 3;283(40):27130–43. doi: 10.1074/jbc.M803649200 (PMC2555995; doi:10.1074/jbc.m803649200), 2008-10-03
Supplement: M803649200_1.pdf [file M803649200_1.pdf]

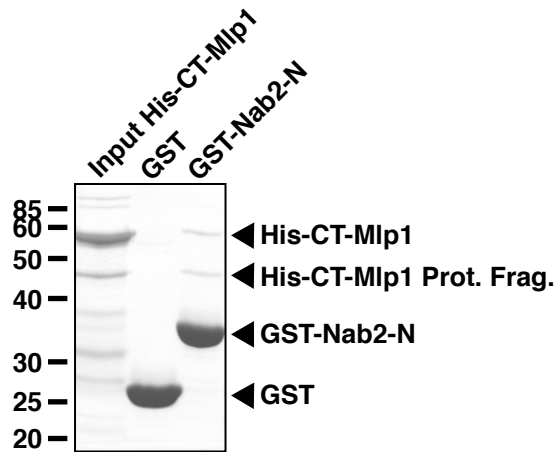

**FIGURE S1. A proteolytic fragment of intact CT-Mlp1 binds to the N-terminal domain of Nab2.** A 45 kD proteolytic fragment of recombinant CT-Mlp1 (CT-Mlp1 Prot. Frag.) binds to the N-terminal domain of Nab2 (Nab2-N; residues 1-97). GST-Nab2-N or, as a control, GST, bound to Sepharose beads was incubated with His-CT-Mlp1 and bound fractions were analyzed by SDS-PAGE and Coomassie staining.
